# Supplementary material
Source: HighWire-hosted journal article supplement (https://erj.ersjournals.com/content/57/5/2004440)
Supplement: inline-supplementary-material-1 [file inline-supplementary-material-1.pdf]

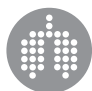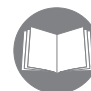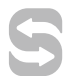

SHAREABLE PDF

# Thoracic aortic aneurysms: expanding the potential cardiovascular consequences of obstructive sleep apnoea

Luciano F. Drager<sup>1,2</sup> and Miguel A. Martinez-Garcia<sup>3,4</sup>

**Affiliations:** <sup>1</sup>Hypertension Unit, Heart Institute (InCor), University of São Paulo, São Paulo, Brazil. <sup>2</sup>Hypertension Unit, Renal Division, University of São Paulo, São Paulo, Brazil. <sup>3</sup>Pneumology Dept, Hospital Universitario i Politécnico La Fe, Valencia, Spain. <sup>4</sup>Centro de Investigación Biomédica en Red (CIBERES), Instituto de Salud Carlos III, Madrid, Spain.

**Correspondence:** Luciano F. Drager, Hypertension Unit, Heart Institute (InCor), University of Sao Paulo Medical School, Avenida Dr Eneas de Carvalho Aguiar, 44, CEP 05403-900 Sao Paulo, Brazil.  
E-mail: luciano.drager@incor.usp.br

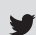

@ERSpublications

**This editorial highlights recent evidence suggesting that a common sleep-related breathing disorder, namely obstructive sleep apnoea, may contribute to thoracic aneurism expansion independent from traditional risk factors** <https://bit.ly/38nxKBY>

**Cite this article as:** Drager LF, Martinez-Garcia MA. Thoracic aortic aneurysms: expanding the potential cardiovascular consequences of obstructive sleep apnoea. *Eur Respir J* 2021; 57: 2004440 [https://doi.org/10.1183/13993003.04440-2020].

This single-page version can be shared freely online.

Over the course of the past decades, we have observed an increased interest in exploring the complex relationships between cardiovascular diseases and obstructive sleep apnoea (OSA) [1]. However, the vast majority of studies have focused their attention on coronary and cerebrovascular diseases and cardiac arrhythmias, without considering other important cardiovascular diseases, such as pulmonary embolism or aortic disorders.
